# Supplementary material for: Is the Availability of Biosimilar Adalimumab Associated with Budget Savings? A Difference-in-Difference Analysis of 14 Countries
Source: Springer Nature journal article supplement (doi:10.1007/s40259-023-00636-z), 2023-12-08
Supplement: MOESM1 [file 26507756]

## Supplementary Information – *BioDrugs*

### Is the Availability of Biosimilar Adalimumab associated with Budget Saving?

#### A Difference-in-Difference Analysis of 14 Countries

Hyunjung Woo<sup>1</sup>, Gyeongseon Shin<sup>1</sup>, Donghwan Lee<sup>2</sup>, Hye-Young Kwon<sup>3\*</sup>, SeungJin Bae<sup>1\*</sup>

<sup>1</sup>College of Pharmacy, Ewha Womans University, Seoul, South Korea

<sup>2</sup>Department of Statistics, Ewha Womans University, Seoul, South Korea

<sup>3</sup>Department of Public Health, Mokwon University, Daejeon, South Korea

#### \*Correspondence:

SeungJin Bae,

College of Pharmacy, Ewha Womans University, Seoul, South Korea

Email: [sjbae@ewha.ac.kr](mailto:sjbae@ewha.ac.kr)

Hye-Young Kwon,

Department of Public Health, Mokwon University, Daejeon, South Korea

Email: [haeyoungkwon0111@gmail.com](mailto:haeyoungkwon0111@gmail.com)

#### Funding

This work was supported by the National Research Foundation (NRF-2021R1F1A10502).

#### Conflicts of interest

All authors have no conflicts of interest to declare.

**Table S1** Quarterly consumption rate of adalimumab 40 mg for all included countries

| <b>Classification of countries based on the availability of adalimumab biosimilar as of Q4 2018</b> | <b>Country</b> | <b>Q4 2018<sup>a</sup></b> | <b>Q4 2019<sup>a</sup></b> |
|-----------------------------------------------------------------------------------------------------|----------------|----------------------------|----------------------------|
| Available                                                                                           | Austria        | 99%                        | 99%                        |
|                                                                                                     | France         | 96%                        | 93%                        |
|                                                                                                     | Germany        | 98%                        | 99%                        |
|                                                                                                     | Italy          | 100%                       | 98%                        |
|                                                                                                     | Spain          | 94%                        | 93%                        |
|                                                                                                     | Sweden         | 98%                        | 98%                        |
|                                                                                                     | Total          | 97%                        | 96%                        |
| Not available                                                                                       | Australia      | 100%                       | 100%                       |
|                                                                                                     | Brazil         | 100%                       | 99%                        |
|                                                                                                     | Canada         | 100%                       | 100%                       |
|                                                                                                     | Japan          | 91%                        | 89%                        |
|                                                                                                     | Korea          | 100%                       | 100%                       |
|                                                                                                     | Singapore      | 100%                       | 99%                        |
|                                                                                                     | South Africa   | 100%                       | 100%                       |
|                                                                                                     | Taiwan         | 100%                       | 100%                       |
| Total                                                                                               | 97%            | 97%                        |                            |
| Total                                                                                               |                | 97%                        | 96%                        |

<sup>a</sup>The quarterly consumption rate of adalimumab 40 mg was calculated by dividing the sales volume in standard units of adalimumab 40 mg by the total sales volume in standard units, encompassing all adalimumab doses, including 20 mg, 40 mg and 80 mg

**Table S2** Dates corresponding to the first marketing of adalimumab biosimilars for each country

| <b>Country</b> | <b>Dates corresponding to the first marketing of adalimumab biosimilars</b> |
|----------------|-----------------------------------------------------------------------------|
| Austria        |                                                                             |
| France         |                                                                             |
| Germany        | October 16, 2018 <sup>a</sup>                                               |
| Italy          |                                                                             |
| Spain          |                                                                             |
| Sweden         |                                                                             |

<sup>a</sup>This was referenced by Big Molecule Watch (Amgen, Sandoz, Samsung, and Mylan Launch Biosimilars in Europe (UPDATED); <https://www.bigmoleculewatch.com/2018/11/02/amgen-sandoz-samsung-and-mylan-launch-biosimilars-in-europe-updated/>. Accessed November 2, 2018.)
